# Supplementary material for: Survey of Toxin–Antitoxin Systems in Erwinia amylovora Reveals Insights into Diversity and Functional Specificity
Source: MDPI journal article supplement (doi:10.3390/toxins11040206), 2019-04-06
Supplement: s1 [file s1]

| No | Strain                         | Accession No   |
|----|--------------------------------|----------------|
| 1  | <i>E. amylovora</i> LA092      | WP_099319755   |
| 2  | <i>E. amylovora</i> MAGFLFL 2  | WP_004155189.1 |
| 3  | <i>E. amylovora</i> 01SFRBO    | CCO88626.1     |
| 4  | <i>E. amylovora</i> ATCC 49946 | CBJ47694.1     |
| 5  | <i>E. amylovora</i> CFBP1430   | CBA19342.1     |
| 6  | <i>E. amylovora</i> CTBT3-1    | WP_004155189.1 |
| 7  | <i>E. amylovora</i> UPN527     | CCO97736.1     |
| 8  | <i>E. amylovora</i> E-2        | WP_004155189.1 |
| 9  | <i>E. amylovora</i> NHSB01-1   | WP_004155189.1 |
| 10 | <i>E. amylovora</i> CTBT3-1    | WP_004155189.1 |
| 11 | <i>E. amylovora</i> MASHBO     | WP_004155189.1 |
| 12 | <i>E. oleae</i> DAPP-PG531     | WP_034949502.1 |
| 13 | <i>P. ananatis</i> LMG 5342    | CCF08502.1     |
| 14 | <i>P. parmentieri</i> WPP163   | ACX87181.1     |

|    |                                 |                |
|----|---------------------------------|----------------|
| 15 | <i>P. atrosepticum</i> SCRI1043 | CAG75753.1     |
| 16 | <i>P. carotovorum</i> PCC21     | AFR04662.1     |
| 17 | <i>D. zeae</i> Ech586           | ACZ75307.1     |
| 18 | <i>E. coli</i> W_1              | WP_001095907.1 |
| 19 | <i>E. coli</i> W_2              | WP_000691790.1 |
| 20 | <i>E. coli</i> BW25113_1        | AIN30763.1     |
| 21 | <i>E. coli</i> BW25113_2        | AIN33039.1     |
| 22 | <i>E. coli</i> BW25113_3        | AIN32423.1     |
| 23 | <i>E. coli</i> CFT073_1         | AAN80986.1     |
| 24 | <i>E. coli</i> CFT073_2         | AAN78757.1     |
| 25 | <i>E. coli</i> CFT073_3         | AAN82125.1     |
| 26 | <i>E. coli</i> CFT073_4         | AAN79761.1     |
| 27 | <i>E. coli</i> CFT073_5         | AAN83010.1     |
| 28 | <i>E. coli</i> CFT073_6         | AAN83571.1     |
| 29 | <i>E. coli</i> O157:H7 Sakai_1  | WP_000854914.1 |
| 30 | <i>E. coli</i> O157:H7 Sakai_2  | WP_000854712.1 |
| 31 | <i>E. coli</i> O157:H7 Sakai_3  | WP_001303564.1 |

Table S2. Strains and plasmids used in the study.

| Strains and Plasmids     | Relevant Characters                                                                                                                                                         | Source                           |
|--------------------------|-----------------------------------------------------------------------------------------------------------------------------------------------------------------------------|----------------------------------|
| <i>Escherichia coli</i>  |                                                                                                                                                                             |                                  |
| DH5 $\alpha$             | F - 80dlacZ $\Delta$ M15 $\Delta$ (lacZYA-argF)U169 endA1 recA1 hsdR17(r K - m K + ) deoR thi-1 supE44 gyrA96 relA1 $\lambda$                                               | Invitrogen                       |
| BL21(DE3)                | fhuA2 ompT gal ( $\lambda$ DE3) (dcm) $\Delta$ hsdS $\lambda$ DE3 = $\lambda$ sBamHI $\Delta$ EcoRI-B int:: (lacI::PlacUV5::T7 gene1) i21 $\Delta$ nin5                     | Coli Genetic Stock Center (CGSC) |
| BW25113                  | <i>lacI<sup>h</sup> rrnB<sup>r14</sup> <math>\Delta</math>lacZ<sub>WJ16</sub> hsdR514 <math>\Delta</math>araBAD<sub>AH33</sub> <math>\Delta</math>rhaBAD<sub>LD78</sub></i> | CGSC                             |
| <i>Erwinia amylovora</i> |                                                                                                                                                                             |                                  |
| CTBT3-1                  | Wild type                                                                                                                                                                   | [ 3]                             |
| Plasmids                 |                                                                                                                                                                             |                                  |
| pENTR-D-Topo             | Entry vector for Gateway cloning technology, Km <sup>R</sup>                                                                                                                | Invitrogen                       |
| pENTR-D-topocbtA         | <i>cbtA</i> from CTBT3-1 cloned into pENTR-D-topo, Km <sup>R</sup>                                                                                                          | This study                       |
| pENTR-D-topocbeA         | <i>cbeA</i> from CTBT3-1 cloned into pENTR-D-topo, Km <sup>R</sup>                                                                                                          | This study                       |
| pENTR-D-topoGNAT         | Gene encoding GNAT protein from CTBT3-1 cloned into pENTR-D-topo, Km <sup>R</sup>                                                                                           | This study                       |
| pENTR-D-topoXG           | <i>xre</i> -GNAT loci from CTBT3-1 cloned into pENTR-D-topo, Km <sup>R</sup>                                                                                                | This study                       |
| pENTR-D-topocbtAEc       | <i>cbtA</i> from <i>E. coli</i> strain BW25113 cloned into pENTR-D-topo, Km <sup>R</sup>                                                                                    | This study                       |
| pENTR-D-TopoftsZEc       | <i>ftsZ</i> from <i>E. coli</i> strain BW25113 cloned into pENTR/D-topo, Km <sup>R</sup>                                                                                    | This study                       |
| pENTR-D-topomreB         | <i>mreB</i> from CTBT3-1 cloned into pENTR-D-topo, Km <sup>R</sup>                                                                                                          | This study                       |
| pENTR-D-topoftsZ         | <i>ftsZ</i> from CTBT3-1 cloned into pENTR-D-topo, Km <sup>R</sup>                                                                                                          | This study                       |
| pDEST-527                | Gateway destination vector for <i>E. coli</i> expression, T7 promoter, N-terminal 6xHis tag, Amp <sup>R</sup> , Cm <sup>R</sup>                                             | Addgene.org                      |
| pDEST-cbtA               | insert from pENTR-D-topocbtA recombined into pDEST-527, Amp <sup>R</sup>                                                                                                    | This study                       |
| pDEST-GNAT               | insert from pENTR-D-topoGNAT recombined into pDEST-527                                                                                                                      | This study                       |
| pDEST-xre-GNAT           | insert from pENTR-D-topoXG recombined into pDEST-527, Amp <sup>R</sup>                                                                                                      | This study                       |
| pBAD33                   | Expression vector allowing cloning of target genes downstream of the P <sub>BAD</sub> promoter, Cm <sup>r</sup>                                                             | [23]                             |

|                            |                                                                                             |            |
|----------------------------|---------------------------------------------------------------------------------------------|------------|
| pBAD- <i>parE</i>          | XbaI-HindIII flanked <i>parE</i> from CTBT3-1 cloned in pbad33, Cm <sup>r</sup>             | This study |
| pBAD- <i>rrh-parE</i>      | XbaI-HindIII flanked <i>rrh-parE</i> loci from CTBT3-1 cloned in pbad33, Cm <sup>r</sup>    | This study |
| pBAD- <i>doc</i>           | XbaI-HindIII flanked <i>doc</i> from CTBT3-1 cloned in pbad33, Cm <sup>r</sup>              | This study |
| pBAD- <i>phd-doc</i>       | XbaI-HindIII flanked <i>phd-doc</i> loci from CTBT3-1 cloned in pbad33                      | This study |
| pBAD- <i>hicA</i>          | XbaI-HindIII flanked <i>hicA</i> from CTBT3-1 cloned in pbad33, Cm <sup>r</sup>             | This study |
| pBAD- <i>vapC</i>          | Xba-HindIII flanked <i>vapC</i> from pEA29 plasmid cloned in pbad33, Cm <sup>r</sup>        | This study |
| pEVS143                    | Broad-host-range cloning vector; inducible Cm <sup>r</sup> and GFP; Km <sup>r</sup>         | [24]       |
| pEVScv                     | 150 bp of EAMY 1412 cloned into EcoRI-BamHI sites of pesv143, Km <sup>r</sup>               | This study |
| pEVS- <i>cbtA</i>          | EcoRI-BamHI flanked <i>cbtA</i> from CTBT3-1 cloned into pesv143, Km <sup>r</sup>           | This study |
| pEVS- <i>cbeA-cbtA</i>     | EcoRI-BamHI flanked <i>cbeA-cbtA</i> loci from CTBT3-1 cloned into pesv143, Km <sup>r</sup> | This study |
| pEVS- <i>hicA</i>          | EcoRI-BamHI flanked <i>hicA</i> from CTBT3-1 cloned into pesv143, Km <sup>r</sup>           | This study |
| pEVS- <i>vapC</i>          | EcoRI-BamHI flanked <i>vapC</i> from pEA29 plasmid cloned into pesv143, Km <sup>r</sup>     | This study |
| pACTGW-attR                | Gateway destination vector with Gal4-AD domain, Amp <sup>R</sup>                            | [25]       |
| pASGW-attR                 | Gateway destination vector with Gal4-BD domain, Amp <sup>R</sup>                            | [25]       |
| pACTGW-attR <i>cbtA</i>    | Insert from pENTR/D-topo <i>cbtA</i> recombined into pACTGW-attR, Amp <sup>R</sup>          | This study |
| pACTGW-attR <i>cbeA</i>    | Insert from pENTR/D-topo <i>cbeA</i> recombined into pACTGW-attR, Amp <sup>R</sup>          | This study |
| pACTGW-attR <i>rmreB</i>   | Insert from pENTR/D-topo <i>rmreB</i> recombined into pACTGW-attR, Amp <sup>R</sup>         | This study |
| pACTGW-attR <i>ftsZ</i>    | Insert from pENTR/D-topo <i>ftsZ</i> recombined into pACTGW-attR, Amp <sup>R</sup>          | This study |
| pACTGW-attR <i>cbtA</i> Ec | insert from pENTR/D-topo <i>cbtA</i> Ec recombined into pACTGW-attR, Amp <sup>R</sup>       | This study |
| pACTGW-attR <i>ftsZ</i> Ec | insert from pENTR/D-topo <i>ftsZ</i> Ec recombined into pACTGW-attR, Amp <sup>R</sup>       | This study |
| pASGW-attR <i>cbtA</i>     | Insert from pENTR/D-topo <i>cbtA</i> recombined into pASGW-attR, Amp <sup>R</sup>           | This study |
| pASGW-attR <i>cbeA</i>     | Insert from pENTR/D-topo <i>cbeA</i> recombined into pASGW-attR, Amp <sup>R</sup>           | This study |
| pASGW-attR <i>rmreB</i>    | Insert from pENTR/D-topo <i>rmreB</i> recombined into pASGW-attR, Amp <sup>R</sup>          | This study |
| pASGW-attR <i>ftsZ</i>     | Insert from pENTR/D-topo <i>ftsZ</i> recombined into pASGW-attR, Amp <sup>R</sup>           | This study |
| pASGW-attR <i>cbtA</i> Ec  | insert from pENTR/D-topo- <i>cbtA</i> Ec recombined into pASGW-attR, Amp <sup>R</sup>       | This study |
| pASGW-attR <i>ftsZ</i> Ec  | insert from pENTR/D-topo- <i>ftsZ</i> Ec recombined into pASGW-attR, Amp <sup>R</sup>       | This study |

Table S3. Primers used in the study.

| Primer                 | Sequence 5'-3'            |
|------------------------|---------------------------|
| cbtA <sub>topo</sub> F | caccatgcacatttcaactgtaccg |

|              |                                                  |
|--------------|--------------------------------------------------|
| cbtAtopo R   | ttaaatatttattaatccggtagctcg                      |
| GNATtopoF    | caccatgacggactatcaatgg                           |
| GNATtopoR    | ttagagcgattcagcgatatac                           |
| XGtopoF      | caccctgaggctggaaaaaactgg                         |
| EccbAtopo F  | caccatgaaaacattacctgtattaccg                     |
| EccbAtopo R  | tcatttcgcctccggatactta                           |
| pBADparEF    | gatctctagaaggaggagagtaatgagctatgaactgctcttcg     |
| pBADparER    | gatcaagctt tcaaagccttataaccaacatt                |
| pBADrhhF     | gatctctagaaggaggagagtaatgagacaactcgcgaacaga      |
| pBADhicF     | gatctctagaaggaggagagtaatgatagaggccgatggat        |
| pBADhicR     | gatcaagctt ttaaagccccgcctgttt                    |
| pBADdocF     | gatctctagaaggaggagagtaatgacggactatcaatgg         |
| pBADdocR     | gatcaagctt ttagagcgattcagcgatatac                |
| pBADphdF     | gatctctagaaggaggagagtaatgcaagctataaaactttactaccg |
| pBADvapF     | gatctctagaaggaggagagtaatgttcatggcctatgagccagaaa  |
| pBADvapR     | gatcaagcttctaccggggcgggggcagt                    |
| pbadrhhF     | gatctctagaaggaggagagtaatgagacaactcgcgaacaga      |
| pbadphdF     | gatctctagaaggaggagagtaatgcaagctataaaactttactaccg |
| pEVScbtA F   | gatcgaattcatgcacatttcaactgtaccg                  |
| pEVScbtA R   | gatcggatccttaaatatttattaatccggtagctcg            |
| pEVShic F    | gatcgaattcatgatagaggccgatggatg                   |
| pEVShic R    | gatcggatccttaaaagccccgcctgttttt                  |
| pEVSvap F    | gatcgaattcatgttcatggcctatgagccagaaa              |
| pEVSvap R    | gatcggatccctaccggggcgggggcagt                    |
| pEVScbeA F   | gatcgaattcatgtcaatcacactacctca                   |
| pEVScvF      | gatcgaattcatgaaaatcattcagaccaa                   |
| pEVScvR      | gatcggatccatcgtaacgatcgactacc                    |
| cbeAtopoF    | caccatgtcaatcacactacctca                         |
| cbeAtopoR    | ttatgggggttgataaatag                             |
| mreBtopoEaF  | caccatgtttaaaaaattccgaggc                        |
| mreBtopoEaR  | ttattcttcgctgaacaaatc                            |
| ftsZtopoEaF  | caccatgtttgaaccaatggaactaa                       |
| ftsZBtopoEaR | ttaatctgcctgcttacgc                              |
| ftsZtopoEcF  | caccatgtttgaaccaatggaactta                       |
| ftsZtopoEcR  | ttaatcagcttgcttacgcagg                           |
| EccbAtopoF   | caccatgaaaacattacctgtattaccg                     |
| EccbAtopoR   | tcatttcgcctccggatactta                           |

---
